# Supplementary material for: HRPK-1, a conserved KH-domain protein, modulates microRNA activity during Caenorhabditis elegans development
Source: PLoS Genet. 2019 Oct 4;15(10):e1008067. doi: 10.1371/journal.pgen.1008067 (PMC6795461; doi:10.1371/journal.pgen.1008067)
Supplement: S3 Table — (XLSX) [file pgen.1008067.s003.xlsx]

## Sheet: S3 Table
Table S3. DEseq analysis of miRNA abundances in hrpk-1(zen17) vs wild type L4 larvae.
	baseMean	wt (N2) L4 larvae, average ppm	hrpk-1(zen17) L4 larvae, average ppm	Log2 of wt average ppm	log2FoldChange	lfcSE	stat	pvalue	padj
>cel-miR-58-3p(g)	4.65764e+06	259469	265480	17.9852	-0.146692	0.529949	-0.276804	0.78193	0.993815
>cel-miR-1-3p(g)	3.36946e+06	251955	160435	17.9428	-0.607679	0.363054	-1.6738	0.0941707	0.482625
>cel-miR-48-5p(g)	1.94744e+06	97536.3	130823	16.5737	0.25115	0.434147	0.578489	0.562934	0.961679
>cel-miR-81-3p(g)	794018	46378.7	52321.4	15.5012	0.140201	0.2673	0.524509	0.599924	0.969336
>cel-miR-82-3p(g)	700812	36995.1	47780	15.175	0.264835	0.328971	0.805039	0.420797	0.915365
>cel-miR-65-5p(g)	604997	30582.8	42694.3	14.9004	0.347351	0.401267	0.865637	0.386689	0.899533
>cel-miR-228-5p(g)	433569	24339.9	30848.7	14.571	0.379567	0.272219	1.39435	0.163213	0.625004
>cel-miR-71-5p(g)	379314	22963.8	25621	14.4871	0.147487	0.295793	0.498616	0.61805	0.984079
>cel-miR-55-3p(g)	315919	22059	18114.1	14.4291	-0.22757	0.298022	-0.7636	0.445106	0.915365
>cel-miR-80-3p(g)	385813	21316.4	25189.2	14.3797	0.135347	0.367229	0.368563	0.712454	0.993815
>cel-let-7-5p(g)	400491	21033.2	27176.2	14.3604	0.205237	0.441749	0.464601	0.642217	0.98519
>cel-miR-56-3p(g)	243676	18537.7	12954.4	14.1782	-0.437317	0.314128	-1.39216	0.163873	0.625004
>cel-miR-51-5p(g)	190191	13787.4	10338.3	13.7511	-0.366822	0.252683	-1.45171	0.146583	0.608598
>cel-miR-72-5p(g)	221084	12501.9	14541.6	13.6099	0.189377	0.28721	0.659367	0.50966	0.947761
>cel-miR-64-5p(g)	220007	12227.9	14548.9	13.5779	0.123713	0.400745	0.308706	0.757545	0.993815
>cel-miR-66-5p(g)	200175	8521.81	16344.9	13.0569	0.877614	0.275425	3.1864	0.00144058	0.0687146
>cel-miR-45-3p(g)	122514	8458.47	6968.09	13.0462	-0.205379	0.287056	-0.715466	0.474321	0.915365
>cel-miR-44-3p(g)	122396	8451.3	6960.07	13.045	-0.205795	0.287139	-0.71671	0.473553	0.915365
>cel-miR-241-5p(g)	108189	7270.79	5780.53	12.8279	-0.465589	0.395968	-1.17583	0.239664	0.747197
>cel-miR-60-3p(g)	72975.9	5095.68	4113.53	12.3151	-0.267229	0.27265	-0.980119	0.327027	0.850116
>cel-miR-90-3p(g)	69923.3	4859.1	4037.79	12.2465	-0.197844	0.27269	-0.725525	0.46813	0.915365
>cel-miR-238-3p(g)	80372.3	4649.23	5603.97	12.1828	0.27642	0.274415	1.0073	0.313788	0.836769
>cel-miR-77-3p(g)	78454.1	4119.1	5641.01	12.0081	0.295288	0.408956	0.722054	0.470262	0.915365
>cel-miR-46-3p(g)	71293.2	4093.05	4815.09	11.999	0.227204	0.277502	0.818747	0.412931	0.915365
>cel-miR-84-5p(g)	73816.6	3976.07	5176.1	11.9571	0.358307	0.253081	1.41578	0.15684	0.625004
>cel-miR-70-3p(g)	113694	3678.49	9831.17	11.8449	1.18577	0.554279	2.1393	0.0324115	0.317198
>cel-miR-73-3p(g)	57560.4	3632.91	3614.03	11.8269	0.0162531	0.243934	0.0666291	0.946877	0.994555
>cel-miR-47-3p(g)	56415.6	3402.67	3699.02	11.7325	0.1255	0.257861	0.486697	0.626473	0.98519
>cel-lin-4-5p(g)	47827.9	3330.79	2709.76	11.7017	-0.273887	0.246924	-1.10919	0.267346	0.782943
>cel-miR-61-3p(g)	40649.1	2883.36	2195.34	11.4935	-0.390805	0.242896	-1.60894	0.107629	0.525992
>cel-miR-52-5p(g)	31987	2318.99	1878.02	11.1793	-0.191336	0.361785	-0.528866	0.596899	0.969336
>cel-miR-235-3p(g)	39798.3	2103.18	2898.19	11.0384	0.308139	0.400573	0.769245	0.441748	0.915365
>cel-miR-50-5p(g)	30065.9	1780.44	1933.34	10.798	0.0975362	0.306527	0.318198	0.750335	0.993815
>cel-miR-237-5p(g)	27063.8	1472.55	1938.13	10.5241	0.339057	0.290089	1.1688	0.242483	0.747197
>cel-miR-234-3p(g)	20523.4	1466.57	1158.49	10.5182	-0.25223	0.316751	-0.796305	0.425855	0.915365
>cel-miR-63-3p(g)	28477.4	1431.68	2127.53	10.4835	0.521381	0.294874	1.76815	0.077036	0.440123
>cel-miR-229-3p(s)	14795.9	1421.19	596.422	10.4729	-1.06062	0.460235	-2.30451	0.0211939	0.291263
>cel-miR-87-3p(g)	21589.6	1386.25	1312.35	10.437	-0.0288932	0.280265	-0.103092	0.91789	0.994555
>cel-miR-57-5p(g)	28450.2	1355.05	2241.25	10.4041	0.665117	0.315145	2.11051	0.0348145	0.317198
>cel-miR-42-3p(g)	18067.1	1218.73	1125.36	10.2512	0.0712642	0.4353	0.163713	0.869957	0.994555
>cel-miR-233-3p(g)	12621	863.167	753.214	9.7535	-0.110222	0.324808	-0.339345	0.734349	0.993815
>cel-miR-79-3p(g)	11498	796.853	652.687	9.63817	-0.217838	0.293557	-0.742063	0.458049	0.915365
>cel-miR-786-3p(g)	18223.8	766.181	1491.23	9.58154	0.799678	0.451429	1.77144	0.0764882	0.440123
>cel-miR-86-5p(g)	7969.36	748.88	306.974	9.54859	-1.1579	0.35725	-3.24116	0.00119043	0.0687146
>cel-miR-252-5p(g)	11070.1	700.159	684.626	9.45154	-0.0527279	0.267965	-0.196772	0.844006	0.993815
>cel-miR-54-3p(g)	10232.6	687.022	603.232	9.42421	-0.124927	0.278765	-0.448142	0.65405	0.98519
>cel-miR-80-5p(s)	11660.2	683.812	709.122	9.41746	-0.0877086	0.4203	-0.208681	0.834697	0.993815
>cel-miR-35-3p(g)	6787.31	519.661	273.581	9.02143	-1.10511	0.483229	-2.28693	0.0221999	0.291263
>cel-miR-253-3p(g)	6550.62	474.118	355.916	8.8891	-0.502626	0.35885	-1.40066	0.161317	0.625004
>cel-miR-230-3p(g)	6299.85	470.07	366.049	8.87673	-0.225994	0.395763	-0.571033	0.567977	0.965267
>cel-miR-248-3p(g)	8407.13	424.662	660.386	8.73017	0.610534	0.323046	1.88993	0.0587671	0.385512
>cel-miR-246-3p(g)	11564.5	387.795	1098.73	8.59915	1.24322	0.563133	2.20769	0.0272661	0.317198
>cel-miR-76-3p(g)	5013.85	383.426	284.27	8.5828	-0.32401	0.40683	-0.796426	0.425784	0.915365
>cel-miR-83-3p(g)	5091.65	377.775	256.638	8.56138	-0.53189	0.257758	-2.06353	0.0390624	0.345281
>cel-miR-40-3p(g)	7316.59	365.446	529.065	8.51351	0.452169	0.303565	1.48953	0.136348	0.581008
>cel-miR-236-3p(g)	5097.9	328.075	301.207	8.35788	-0.080371	0.305606	-0.262989	0.792559	0.993815
>cel-miR-250-3p(g)	4062.62	320.034	169.14	8.32208	-0.992012	0.335175	-2.95968	0.00307959	0.101011
>cel-miR-74-3p(g)	4142.46	297.25	221.95	8.21553	-0.357175	0.299276	-1.19347	0.232687	0.739357
>cel-miR-71-3p(s)	4073.58	290.375	221.165	8.18177	-0.438096	0.291049	-1.50523	0.132265	0.578437
>cel-miR-49-3p(g)	3827.25	284.586	208.84	8.15272	-0.416033	0.288523	-1.44194	0.149318	0.612206
>cel-miR-85-3p(g)	7427.55	271.153	658.025	8.08296	1.04852	0.547746	1.91424	0.05559	0.379865
>cel-miR-790-5p(g)	3421.04	270.898	184.663	8.08161	-0.412606	0.430066	-0.959401	0.337357	0.850116
>cel-miR-59-3p(g)	6479.41	261.748	519.991	8.03203	0.855614	0.442839	1.93211	0.0533459	0.379865
>cel-miR-62-3p(g)	3072.74	248.725	146.781	7.95841	-0.619958	0.386871	-1.60249	0.109047	0.525992
>cel-miR-2-3p(g)	3725.49	229.344	230.215	7.84137	0.0305795	0.28416	0.107613	0.914302	0.994555
>cel-miR-793-3p(g)	2879.61	212.254	152.763	7.72965	-0.366073	0.368377	-0.993746	0.320347	0.847368
>cel-miR-37-3p(g)	2418.02	204.286	61.5669	7.67444	-1.97991	0.587298	-3.37122	0.000748364	0.0613658
>cel-miR-785-3p(g)	3303.73	180.741	233.291	7.49778	0.346015	0.264549	1.30794	0.190893	0.652216
>cel-miR-58-5p(s)	2339.97	171.585	124.89	7.42278	-0.480091	0.308035	-1.55856	0.119101	0.550212
>cel-miR-241-3p(s)	2374.03	168.862	129.683	7.39971	-0.401524	0.269597	-1.48935	0.136395	0.581008
>cel-miR-47-5p(s)	2128.32	157.435	114.22	7.29862	-0.376207	0.312814	-1.20265	0.22911	0.736745
>cel-miR-240-3p(g)	2587.36	125.608	198.815	6.97278	0.540238	0.404585	1.33529	0.181782	0.644181
>cel-miR-245-3p(g)	1559.26	112.66	92.643	6.81584	-0.163465	0.374979	-0.435931	0.662887	0.988292
>cel-miR-124-3p(g)	1441.23	111.148	67.9489	6.79634	-0.679914	0.27907	-2.43636	0.0148361	0.263014
>cel-miR-39-3p(g)	1589.56	107.052	78.0061	6.74217	-0.642442	0.478468	-1.34271	0.179367	0.644181
>cel-miR-63-5p(s)	2272	105.956	181.599	6.72732	0.680718	0.331455	2.05373	0.0400021	0.345281
>cel-miR-355-5p(g)	1204.06	104.982	54.316	6.714	-0.795559	0.398631	-1.99573	0.0459637	0.362083
>cel-miR-46-5p(s)	1361.56	104.376	72.672	6.70564	-0.382807	0.394561	-0.97021	0.331942	0.850116
>cel-miR-255-3p(g)	1475.91	99.1745	84.1066	6.6319	-0.18231	0.309968	-0.588158	0.556426	0.961679
>cel-miR-53-5p(g)	1432.58	98.8904	88.5467	6.62776	-0.0752	0.353	-0.213031	0.831303	0.993815
>cel-miR-34-5p(g)	1355.58	87.4208	88.149	6.4499	-0.000288792	0.333473	-0.000866013	0.999309	0.999669
>cel-miR-230-5p(s)	1577.92	85.3558	113.72	6.41542	0.400962	0.259673	1.5441	0.122563	0.550694
>cel-miR-77-5p(s)	1501.67	79.9003	104.857	6.32013	0.14918	0.614904	0.242607	0.80831	0.993815
>cel-miR-54-5p(s)	1369.95	79.8503	88.6396	6.31923	0.0407793	0.367902	0.110843	0.911741	0.994555
>cel-miR-788-3p(g)	1707.79	77.6882	133.287	6.27962	0.714292	0.30105	2.37267	0.01766	0.268764
>cel-miR-229-5p(g)	1128.1	69.828	71.2325	6.12573	0.0475804	0.248867	0.191188	0.848378	0.993815
>cel-miR-1829c-5p(g)	1565.55	69.7615	126.7	6.12436	0.850581	0.2851	2.98345	0.00285022	0.101011
>cel-miR-232-3p(g)	1070	65.6658	70.0635	6.03707	0.143706	0.282649	0.508427	0.611154	0.978766
>cel-miR-1022-5p(g)	797.811	64.5333	42.0566	6.01197	-0.450373	0.421276	-1.06907	0.285038	0.80522
>cel-miR-1020-3p(g)	879.995	62.9799	45.0382	5.97682	-0.503485	0.298173	-1.68857	0.091302	0.47535
>cel-miR-243-5p(s)	852.904	59.7	49.6215	5.89966	-0.207427	0.323681	-0.640836	0.521629	0.948356
>cel-miR-4816-3p(g)	761.973	56.0979	43.7675	5.80987	-0.263397	0.351628	-0.74908	0.453809	0.915365
>cel-miR-788-5p(s)	831.119	54.7939	50.1281	5.77594	0.0039701	0.378427	0.0104911	0.99163	0.999669
>cel-miR-244-5p(g)	716.824	50.9121	41.742	5.66994	-0.161856	0.365396	-0.44296	0.657795	0.98519
>cel-miR-5592-3p(g)	1147.29	50.317	91.9232	5.65297	0.660016	0.486842	1.35571	0.175192	0.644181
>cel-miR-259-5p(g)	1013.48	49.3559	77.8922	5.62515	0.642251	0.255037	2.51827	0.0117934	0.263014
>cel-miR-359(g)	1231.33	49.2192	103.681	5.62115	0.87318	0.470041	1.85767	0.0632163	0.398749
>cel-miR-243-3p(g)	905.176	49.1976	65.0358	5.62052	0.315728	0.336061	0.939496	0.347476	0.850116
>cel-miR-1829a-3p(s)	723.198	44.6303	46.4725	5.47995	0.142178	0.303499	0.468464	0.639453	0.98519
>cel-miR-357-3p(g)	1069.39	43.7435	88.6098	5.451	0.87105	0.40312	2.16077	0.0307132	0.317198
>cel-miR-67-3p(g)	862.819	41.1267	66.5742	5.362	0.67699	0.269887	2.50842	0.0121273	0.263014
>cel-miR-787-3p(g)	617.289	39.5266	34.7754	5.30475	-0.254013	0.356095	-0.713329	0.475642	0.915365
>cel-miR-356b-3p(g)	577.119	35.4123	36.9348	5.14618	0.0364232	0.275503	0.132206	0.894821	0.994555
>cel-miR-250-5p(s)	464.057	34.8764	22.9134	5.12418	-0.675724	0.333691	-2.025	0.0428673	0.360525
>cel-miR-72-3p(s)	388.947	34.0447	16.1795	5.08936	-1.03359	0.300977	-3.43411	0.000594508	0.0613658
>cel-miR-247-3p(g)	656.641	32.542	48.5402	5.02423	0.624459	0.315326	1.98036	0.0476629	0.362083
>cel-miR-1817-59(g)	642.921	31.1776	46.8666	4.96244	0.44165	0.562538	0.785102	0.432394	0.915365
>cel-miR-61-5p(s)	419.743	31.1001	21.6451	4.95885	-0.438331	0.362595	-1.20887	0.226712	0.736252
>cel-miR-231-3p(g)	513.54	30.0895	35.7704	4.91119	0.270592	0.288992	0.936328	0.349104	0.850116
>cel-miR-795-5p(g)	667.056	29.5595	54.1136	4.88555	0.804565	0.325378	2.47271	0.0134093	0.263014
>cel-miR-1819-3p(g)	623.853	28.6983	49.4833	4.84289	0.817511	0.261251	3.12922	0.00175273	0.0718621
>cel-miR-4816-5p(s)	435.504	28.5735	26.4766	4.83661	-0.0625372	0.297805	-0.209994	0.833673	0.993815
>cel-miR-789(g)	466.601	27.2707	31.1293	4.76928	0.0652782	0.403897	0.161621	0.871604	0.994555
>cel-miR-75-5p(s)	609.213	24.7923	52.5947	4.63182	0.880513	0.470855	1.87003	0.06148	0.395401
>cel-miR-239a-3p(s)	340.958	23.3738	18.4105	4.54682	-0.412249	0.31402	-1.31281	0.189246	0.652216
>cel-miR-83-5p(s)	373.152	23.1952	22.8063	4.53575	-0.0437354	0.324351	-0.13484	0.892739	0.994555
>cel-miR-36-3p(g)	342.567	20.0459	20.9585	4.32523	-0.0307216	0.370136	-0.0830008	0.933851	0.994555
>cel-lsy-6-3p(g)	292.405	19.335	17.685	4.27314	-0.0263117	0.345116	-0.0762401	0.939228	0.994555
>cel-miR-239a-5p(g)	276.43	18.7865	17.1008	4.23163	-0.102176	0.361829	-0.282388	0.777646	0.993815
>cel-miR-5551-5p(g)	353.911	18.5677	24.9001	4.21472	0.32125	0.362497	0.886215	0.375501	0.892496
>cel-miR-254-3p(g)	282.322	17.7774	19.3691	4.15197	0.170993	0.379703	0.450332	0.652471	0.98519
>cel-miR-75-3p(g)	256.032	17.654	15.2189	4.14192	-0.248783	0.352676	-0.705413	0.480553	0.915365
>cel-miR-84-3p(s)	310.067	17.0794	20.9953	4.09419	0.258522	0.30925	0.835965	0.403174	0.915365
>cel-miR-240-5p(s)	425.438	16.8553	34.9223	4.07513	0.869243	0.474826	1.83066	0.0671519	0.407886
>cel-miR-799(g)	242.712	16.6135	14.1996	4.05428	-0.156228	0.318158	-0.49104	0.623398	0.98519
>cel-let-7-3p(s)	212.51	15.9604	10.2263	3.99643	-0.606498	0.375165	-1.61661	0.105962	0.525992
>cel-miR-794-5p(g)	258.122	15.7872	16.8496	3.98068	0.142993	0.302455	0.472775	0.636374	0.98519
>cel-miR-48-3p(s)	218.62	15.5311	11.8619	3.95708	-0.401131	0.322613	-1.24338	0.213729	0.715336
>cel-miR-4813-3p(g)	208.829	15.236	11.9681	3.92942	-0.232725	0.380149	-0.612196	0.540408	0.948356
>cel-miR-1821(g)	202.494	14.5095	11.7164	3.85893	-0.166409	0.401637	-0.414327	0.678634	0.993815
>cel-miR-1820-5p(g)	372.648	14.3545	32.9697	3.84344	1.10983	0.348867	3.18124	0.00146647	0.0687146
>cel-miR-51-3p(s)	179.256	14.1021	7.29543	3.81784	-1.12604	0.526655	-2.1381	0.0325083	0.317198
>cel-miR-232-5p(s)	230.569	13.8789	14.3223	3.79482	0.0415132	0.310291	0.133788	0.89357	0.994555
>cel-miR-1829a-5p(g)	257.339	13.6697	17.9927	3.77291	0.321272	0.333715	0.962714	0.335691	0.850116
>cel-miR-249-3p(g)	208.369	13.3303	13.9513	3.73664	0.0928417	0.38949	0.238367	0.811596	0.993815
>cel-miR-242-5p(g)	207.982	12.8613	13.0878	3.68497	0.0206941	0.284533	0.07273	0.942021	0.994555
>cel-miR-65-3p(s)	113.099	12.5464	3.50652	3.6492	-1.55583	0.657839	-2.36507	0.0180268	0.268764
>cel-miR-358-3p(g)	319.823	12.5454	26.7095	3.64909	0.957436	0.38033	2.51738	0.0118231	0.263014
>cel-miR-57-3p(s)	136.535	10.4518	6.78759	3.38568	-0.602974	0.310263	-1.94343	0.051964	0.37876
>cel-miR-60-5p(s)	166.837	10.254	9.77954	3.35811	-0.0963319	0.381166	-0.252729	0.800477	0.993815
>cel-miR-797-5p(g)	206.389	9.50044	16.1938	3.24799	0.882906	0.36213	2.43809	0.014765	0.263014
>cel-miR-79-5p(s)	177.231	9.45137	12.8916	3.24052	0.390386	0.376876	1.03585	0.300273	0.827644
>cel-miR-784-5p(g)	160.789	9.4062	10.4587	3.23361	0.15498	0.32933	0.470591	0.637933	0.98519
>cel-miR-44-5p(s)	136.781	9.39648	8.03788	3.23212	-0.27826	0.365926	-0.760428	0.446999	0.915365
>cel-miR-2-5p(s)	117.289	9.23577	5.65485	3.20723	-0.676111	0.338077	-1.99988	0.0455137	0.362083
>cel-miR-52-3p(s)	127.219	8.06809	7.71871	3.01223	0.0370017	0.402962	0.0918242	0.926838	0.994555
>cel-miR-90-5p(s)	93.7821	7.4499	4.42283	2.89722	-0.667	0.363102	-1.83695	0.0662174	0.407886
>cel-miR-1-5p(s)	102.532	7.29287	5.61564	2.86649	-0.380893	0.461354	-0.825598	0.409032	0.915365
>cel-miR-237-3p(s)	111.968	7.20605	6.91428	2.84921	-0.0592518	0.305823	-0.193745	0.846375	0.993815
>cel-miR-235-5p(s)	110.934	7.0726	6.21789	2.82224	-0.275756	0.447727	-0.615903	0.537958	0.948356
>cel-miR-800-3p(s)	101.148	6.60903	5.9214	2.72444	-0.206039	0.325462	-0.633066	0.52669	0.948356
>cel-miR-45-5p(s)	96.9396	6.4468	6.14861	2.68858	-0.0457833	0.380537	-0.120312	0.904236	0.994555
>cel-miR-2953-3p(s)	80.078	6.22003	4.2838	2.63692	-0.338412	0.518953	-0.652105	0.514334	0.947761
>cel-miR-1822-3p(g)	73.7242	6.07285	3.30949	2.60237	-0.837163	0.381227	-2.19597	0.0280942	0.317198
>cel-miR-78(g)	61.1051	5.5905	1.46831	2.48298	-2.22325	0.632755	-3.5136	0.000442074	0.0613658
>cel-miR-231-5p(s)	75.0245	5.48855	3.93873	2.45642	-0.392222	0.388847	-1.00868	0.313129	0.836769
>cel-miR-236-5p(s)	90.4396	5.29647	6.16245	2.40503	0.180255	0.343341	0.525005	0.59958	0.969336
>cel-miR-70-5p(s)	105.88	5.01641	7.2236	2.32666	0.375682	0.573694	0.654848	0.512566	0.947761
>cel-miR-795-3p(s)	95.2024	4.94457	7.03433	2.30585	0.550458	0.359831	1.52977	0.126074	0.558813
>cel-miR-796-5p(g)	69.8577	4.91395	3.7791	2.29688	-0.344482	0.368512	-0.934792	0.349895	0.850116
>cel-miR-49-5p(s)	55.8742	4.68515	2.69452	2.2281	-0.730313	0.431043	-1.69429	0.0902101	0.47535
>cel-miR-791-3p(g)	98.381	4.67071	7.31435	2.22364	0.597477	0.376806	1.58564	0.112822	0.536311
>cel-miR-66-3p(s)	70.1762	4.52423	4.1951	2.17767	-0.138118	0.348298	-0.396551	0.691699	0.993815
>cel-miR-1830-3p(s)	50.0811	4.43012	2.18988	2.14735	-0.918431	0.429435	-2.1387	0.0324603	0.317198
>cel-miR-4920(g)	73.629	4.21219	4.87409	2.07457	0.267134	0.376257	0.709977	0.477718	0.915365
>cel-miR-794-3p(s)	76.1535	4.07575	5.27776	2.02706	0.372969	0.361987	1.03034	0.302851	0.827793
>cel-miR-43-3p(g)	59.9887	3.94372	3.68336	1.97956	0.000758586	0.411206	0.00184478	0.998528	0.999669
>cel-miR-2220-3p(g)	47.2911	3.84549	2.35251	1.94317	-0.564643	0.485156	-1.16384	0.244489	0.747197
>cel-miR-124-5p(s)	52.2678	3.81378	2.9925	1.93122	-0.249799	0.408912	-0.610887	0.541275	0.948356
>cel-miR-1824-5p(g)	49.592	3.72101	2.76416	1.89569	-0.259951	0.48454	-0.53649	0.59162	0.969336
>cel-miR-4808-3p(g)	55.84	3.72097	3.33351	1.89568	-0.0443427	0.416711	-0.106411	0.915256	0.994555
>cel-miR-791-5p(s)	51.4146	3.54773	3.15401	1.82689	-0.0365681	0.457169	-0.0799881	0.936247	0.994555
>cel-miR-55-5p(s)	41.9941	3.46821	1.74729	1.79419	-0.962973	0.432478	-2.22664	0.0259714	0.315505
>cel-miR-1018(g)	49.3053	3.41571	3.09044	1.77219	-0.00117757	0.499946	-0.00235539	0.998121	0.999669
>cel-miR-4936(g)	42.3764	3.38586	1.69192	1.75952	-1.12317	0.465385	-2.41343	0.0158032	0.263014
>cel-miR-228-3p(s)	46.637	3.35725	2.48785	1.74728	-0.38073	0.413575	-0.920583	0.357268	0.861647
>cel-miR-34-3p(s)	32.8205	3.26447	1.30316	1.70685	-1.13955	0.59334	-1.92056	0.0547867	0.379865
>cel-miR-41-5p(s)	36.3061	3.1289	1.25752	1.64566	-1.45948	0.554277	-2.63313	0.0084603	0.231248
cel-miR-1829b-3p(s)	55.1528	3.00833	3.99053	1.58896	0.350961	0.411781	0.852301	0.394047	0.903828
cel-miR-1829c-3p(s)	55.0681	3.00286	3.96847	1.58634	0.340823	0.412022	0.827196	0.408126	0.915365
>cel-miR-244-3p(s)	41.5205	2.92093	2.20527	1.54643	-0.328433	0.457684	-0.717598	0.473005	0.915365
>cel-miR-1820-3p(s)	38.5204	2.86783	1.92373	1.51996	-0.559419	0.404825	-1.38188	0.16701	0.629646
>cel-miR-38-3p(g)	50.9357	2.76999	3.39511	1.46988	0.217067	0.404677	0.536395	0.591685	0.969336
>cel-miR-56-5p(s)	45.7382	2.58698	3.23248	1.37127	0.34429	0.381391	0.902721	0.366674	0.877877
>cel-miR-82-5p(s)	37.7755	2.5687	2.16631	1.36104	-0.279151	0.477494	-0.584617	0.558805	0.961679
>cel-miR-1830-5p(g)	25.1004	2.46099	1.00672	1.29924	-1.08573	0.61569	-1.76344	0.0778266	0.440123
>cel-miR-67-5p(s)	44.0922	2.41178	2.90838	1.2701	0.16988	0.481855	0.352554	0.724423	0.993815
>cel-miR-233-5p(s)	30.8644	2.24804	1.70426	1.16867	-0.349965	0.461667	-0.758047	0.448423	0.915365
>cel-miR-360-5p(s)	24.6029	2.18651	1.11592	1.12863	-0.726737	0.659301	-1.10228	0.270338	0.784698
>cel-miR-259-3p(s)	41.5763	2.115	3.06123	1.08066	0.449138	0.422837	1.0622	0.288144	0.80522
>cel-miR-87-5p(s)	34.6585	2.08828	2.29601	1.06232	0.0779754	0.48253	0.161597	0.871623	0.994555
>cel-miR-41-3p(g)	24.3538	2.05148	1.17345	1.03667	-0.650799	0.635944	-1.02336	0.306139	0.829863
>cel-miR-358-5p(s)	40.1233	2.02925	2.88784	1.02095	0.45659	0.525867	0.868262	0.385251	0.899533
>cel-miR-2208b-3p(g)	29.8969	1.8644	1.83659	0.898712	-0.0705519	0.466255	-0.151316	0.879726	0.994555
>cel-miR-798(g)	18.4894	1.77404	0.31438	0.827042	-2.71502	0.745616	-3.64132	0.000271249	0.0613658
>cel-miR-2214-5p(g)	41.1946	1.76273	3.54338	0.817808	0.930771	0.490855	1.89622	0.0579305	0.385512
>cel-miR-2953-5p(g)	25.1041	1.73643	1.51551	0.796124	-0.0615487	0.520833	-0.118174	0.90593	0.994555
>cel-miR-246-5p(s)	30.9766	1.67925	2.13858	0.747817	0.0909066	0.641124	0.141792	0.887244	0.994555
>cel-miR-5594-3p(g)	27.5089	1.59883	1.70574	0.677013	-0.0955976	0.538218	-0.177619	0.859022	0.994555
>cel-miR-2217-3p(g)	30.6106	1.59198	2.30316	0.670825	0.555147	0.448904	1.23667	0.216209	0.716329
>cel-miR-792-3p(g)	18.0389	1.5662	0.969313	0.647272	-0.494871	0.742238	-0.666728	0.504946	0.947761
>cel-miR-81-5p(s)	18.5543	1.54185	0.863156	0.624665	-0.789238	0.553699	-1.42539	0.154044	0.623782
>cel-miR-2210-3p(g)	39.1302	1.52749	3.43615	0.61116	1.09993	0.456769	2.40806	0.0160374	0.263014
>cel-miR-800-5p(g)	25.8655	1.46596	1.72522	0.551841	0.209015	0.484062	0.431793	0.665892	0.988292
>cel-miR-1020-5p(s)	16.5944	1.46195	0.666186	0.547891	-0.992401	0.629082	-1.57754	0.114672	0.537318
>cel-miR-86-3p(s)	15.3098	1.32598	0.566722	0.407059	-1.23602	0.581971	-2.12384	0.0336831	0.317198
>cel-miR-4807(g)	13.0681	1.31358	0.518493	0.393505	-1.16053	0.798946	-1.45258	0.14634	0.608598
>cel-miR-239b-5p(g)	29.7016	1.31204	2.21195	0.391812	0.632537	0.53198	1.18902	0.23443	0.739357
>cel-miR-4814-3p(g)	22.4632	1.30666	1.48672	0.385886	0.158885	0.518833	0.306235	0.759426	0.993815
>cel-miR-1829b-5p(g)	29.7212	1.2466	2.35549	0.317994	0.775209	0.631605	1.22736	0.219686	0.720569
>cel-miR-39-5p(s)	15.2556	1.21626	0.508768	0.28245	-1.48617	0.753509	-1.97233	0.0485722	0.362083
>cel-miR-2209a-3p(g)	28.5364	1.19995	2.42429	0.262969	1.12646	0.501079	2.24807	0.0245718	0.309983
>cel-miR-1822-5p(s)	12.6547	1.11113	0.584668	0.152032	-0.765363	0.683489	-1.11979	0.262804	0.776575
>cel-miR-790-3p(s)	11.7476	1.02577	0.471798	0.0367009	-0.959745	0.709741	-1.35225	0.176297	0.644181
>cel-miR-4806-5p(s)	12.2153	0.962211	0.614919	-0.0555742	-0.715275	0.675541	-1.05882	0.289683	0.80522
>cel-miR-2221(g)	10.8761	0.961262	0.558501	-0.0569981	-0.525234	0.83992	-0.625338	0.531749	0.948356
cel-miR-254-5p(s)	10.2836	0.958252	0.360012	-0.061523	-1.27594	0.73872	-1.72724	0.0841253	0.460117
>cel-miR-43-5p(s)	13.7012	0.849091	0.819462	-0.236009	-0.0684352	0.696231	-0.0982938	0.921699	0.994555
>cel-miR-59-5p(s)	14.1022	0.843584	0.770829	-0.245396	-0.346239	0.753996	-0.459205	0.646087	0.98519
>cel-miR-36-5p(s)	8.66899	0.7657	0.288222	-0.385149	-1.45137	0.729938	-1.98834	0.0467736	0.362083
>cel-miR-5549-3p(g)	13.9822	0.742852	0.971904	-0.428853	0.167883	0.721429	0.232708	0.815988	0.993815
>cel-miR-64-3p(s)	11.0356	0.738893	0.619038	-0.436563	-0.375738	0.678878	-0.55347	0.579942	0.969336
>cel-miR-354(g)	10.3682	0.729984	0.610826	-0.454062	-0.207717	0.674828	-0.307807	0.758229	0.993815
>cel-miR-252-3p(s)	8.05943	0.718584	0.288222	-0.476772	-1.31336	0.744154	-1.7649	0.0775807	0.440123
>cel-miR-4929(g)	7.87488	0.685365	0.380546	-0.545056	-0.760744	0.802342	-0.948154	0.343051	0.850116
>cel-miR-4806-3p(g)	7.29916	0.684331	0.240008	-0.547233	-1.40276	0.81225	-1.727	0.0841677	0.460117
>cel-miR-5592-5p(s)	11.3623	0.64509	0.726708	-0.632428	0.00412935	0.674518	0.00612193	0.995115	0.999669
>cel-miR-787-5p(s)	4.65268	0.605931	0.066166	-0.722775	-3.02258	1.31412	-2.30008	0.0214435	0.291263
>cel-miR-4812-3p(s)	8.66666	0.591046	0.512867	-0.758657	-0.31484	0.766959	-0.410505	0.681436	0.993815
>cel-miR-2212-5p(g)	17.879	0.571683	1.60675	-0.806714	1.52312	0.564491	2.69822	0.00697115	0.207867
>cel-miR-251-5p(g)	8.83099	0.568712	0.598489	-0.814229	0.130343	0.724368	0.17994	0.8572	0.994555
>cel-miR-53-3p(s)	10.6828	0.553826	0.75851	-0.852496	0.48389	0.652092	0.742058	0.458052	0.915365
>cel-miR-392-5p(s)	8.68658	0.550386	0.540538	-0.861483	-0.162784	0.956124	-0.170254	0.864811	0.994555
>cel-miR-5546-3p(g)	6.80798	0.54737	0.350275	-0.869412	-0.56027	0.798324	-0.701807	0.482799	0.915365
>cel-miR-5553-3p(g)	9.41066	0.545393	0.601103	-0.874631	0.0686117	0.78328	0.0875954	0.930198	0.994555
>cel-miR-2216-5p(g)	4.90201	0.520089	0.168221	-0.943169	-1.44185	1.03009	-1.39973	0.161593	0.625004
>cel-miR-1823(g)	9.16256	0.518068	0.586173	-0.948786	0.127665	0.695133	0.183655	0.854284	0.994555
>cel-miR-262(g)	13.7319	0.506194	1.18577	-0.982237	1.16656	0.687964	1.69567	0.089949	0.47535
>cel-miR-4809-3p(g)	7.13887	0.501717	0.400011	-0.995055	-0.203288	0.787283	-0.258215	0.796241	0.993815
>cel-miR-42-5p(s)	8.08287	0.479858	0.488231	-1.05932	0.00120651	0.733749	0.0016443	0.998688	0.999669
cel-miR-1818-3p(s)	4.70164	0.475425	0.177947	-1.07271	-1.2072	1.04065	-1.16005	0.246028	0.747197
>cel-miR-797-3p(s)	7.22453	0.424266	0.430271	-1.23696	-0.181431	0.832681	-0.217888	0.827516	0.993815
>cel-miR-392-3p(g)	8.79758	0.423321	0.636998	-1.24018	0.52461	0.842631	0.622586	0.533556	0.948356
>cel-miR-260(g)	9.46928	0.42134	0.823143	-1.24694	0.977262	0.728979	1.34059	0.180054	0.644181
>cel-miR-4922(g)	13.2433	0.403441	1.16112	-1.30957	1.33999	0.827825	1.61868	0.105516	0.525992
>cel-miR-238-5p(s)	7.78037	0.393072	0.641072	-1.34714	0.537568	1.05902	0.507607	0.611729	0.978766
cel-miR-793-5p(s)	5.33365	0.378655	0.297953	-1.40105	-0.212786	0.892795	-0.238337	0.81162	0.993815
>cel-miR-4811-3p(g)	7.40743	0.370651	0.500536	-1.43187	0.0611005	0.956613	0.0638717	0.949072	0.994555
>cel-miR-357-5p(s)	7.36681	0.35331	0.500567	-1.50099	0.452446	0.844789	0.535572	0.592254	0.969336
>cel-miR-356b-5p(s)	7.74181	0.34789	0.636981	-1.5233	0.789941	0.821465	0.961624	0.336238	0.850116
>cel-miR-255-5p(s)	5.68877	0.345867	0.288231	-1.53171	-0.386651	0.977211	-0.395668	0.69235	0.993815
>cel-miR-1834-5p(s)	3.64716	0.343415	0.102052	-1.54198	-1.85813	1.19959	-1.54897	0.121389	0.550694
>cel-miR-4926(g)	5.59397	0.341434	0.360018	-1.55032	0.309367	0.98728	0.313353	0.754012	0.993815
>cel-miR-5547-5p(g)	5.05455	0.340918	0.257954	-1.5525	-0.391019	0.924344	-0.423023	0.672278	0.993276
>cel-miR-4812-5p(g)	6.32447	0.321081	0.478511	-1.63899	0.782571	0.916316	0.854041	0.393082	0.903828
>cel-miR-4925(g)	3.18211	0.305203	0.128227	-1.71216	-0.925885	1.39544	-0.663507	0.507006	0.947761
>cel-miR-360-3p(g)	5.11511	0.303698	0.320007	-1.71929	0.0951244	0.88766	0.107163	0.91466	0.994555
>cel-miR-245-5p(s)	4.80166	0.299738	0.314397	-1.73822	0.297348	1.05072	0.282994	0.777182	0.993815
>cel-miR-4815(g)	3.21815	0.268974	0.142055	-1.89446	-0.901612	1.10287	-0.817513	0.413635	0.915365
>cel-miR-37-5p(s)	3.62229	0.266951	0.150272	-1.90535	-1.08158	1.14588	-0.943887	0.345228	0.850116
>cel-miR-2208b-5p(s)	4.44227	0.254085	0.362589	-1.97661	0.48717	1.07976	0.451182	0.651859	0.98519
>cel-miR-4923b(g)	5.72836	0.248621	0.453849	-2.00798	0.97914	0.899976	1.08796	0.276612	0.795865
>cel-miR-4810(g)	3.62765	0.246124	0.195901	-2.02254	-0.15499	1.3589	-0.114055	0.909194	0.994555
>cel-miR-50-3p(s)	4.43111	0.228268	0.35438	-2.1312	0.645347	1.00856	0.639868	0.522258	0.948356
>cel-miR-5552-3p(g)	3.66995	0.214886	0.292321	-2.21836	0.498274	1.12035	0.444748	0.656502	0.98519
>cel-miR-2218b-3p(g)	3.577	0.213897	0.235901	-2.22501	0.359355	1.13024	0.317944	0.750527	0.993815
>cel-miR-2211-3p(g)	2.71535	0.194533	0.172331	-2.36191	0.000533342	1.28742	0.000414272	0.999669	0.999669
>cel-miR-2215-3p(g)	4.10284	0.187563	0.284112	-2.41455	0.372859	1.05554	0.353239	0.723909	0.993815
>cel-miR-4923a(g)	4.28842	0.186574	0.280013	-2.42218	0.41656	1.21621	0.342508	0.731969	0.993815
>cel-miR-5550-3p(g)	2.35134	0.17319	0.17232	-2.52957	0.0358481	1.6343	0.0219348	0.9825	0.999669
>cel-miR-2208a-5p(s)	2.22702	0.171212	0.120004	-2.54615	-0.309815	1.32085	-0.234557	0.814553	0.993815
>cel-miR-4937(g)	3.24144	0.166265	0.256432	-2.58844	0.508371	1.33534	0.380705	0.703422	0.993815
>cel-miR-85-5p(s)	3.93844	0.147891	0.320018	-2.7574	1.32159	1.24392	1.06244	0.288034	0.80522
>cel-miR-2219-3p(s)	2.42718	0.144923	0.172323	-2.78665	0.0972215	1.49755	0.0649205	0.948237	0.994555
>cel-miR-266(g)	1.74128	0.136961	0.0579483	-2.86816	-1.26269	1.60108	-0.788653	0.430315	0.915365
>cel-miR-247-5p(s)	2.24366	0.133475	0.124111	-2.90535	-0.271085	1.31967	-0.20542	0.837244	0.993815
>cel-miR-2218a-3p(s)	2.0713	0.125559	0.124117	-2.99357	0.134511	1.47532	0.0911745	0.927354	0.994555
>cel-miR-73-5p(s)	1.16932	0.12358	0.0220534	-3.01648	-2.51018	2.2362	-1.12252	0.26164	0.776575
>cel-miR-40-5p(s)	1.8758	0.11463	0.08973	-3.12495	-0.432361	1.85538	-0.233031	0.815738	0.993815
>cel-miR-2209c-3p(g)	1.56867	0.112133	0.0661631	-3.15672	-1.09067	1.79557	-0.607423	0.54357	0.948356
>cel-miR-2216-3p(s)	1.48767	0.109681	0.10616	-3.18862	0.0148514	1.76129	0.00843213	0.993272	0.999669
>cel-miR-1832b-3p(g)	1.18456	0.0997409	0.0441097	-3.32567	-1.30346	1.84893	-0.704983	0.480821	0.915365
>cel-miR-74-5p(s)	5.05291	0.093287	0.514389	-3.42218	2.2497	1.06226	2.11784	0.0341886	0.317198
>cel-miR-234-5p(s)	1.11339	0.0873488	0.0579483	-3.51707	-0.292908	1.95311	-0.14997	0.880788	0.994555
>cel-miR-4813-5p(s)	1.6016	0.0828736	0.120001	-3.59294	0.593489	1.49912	0.395891	0.692186	0.993815
>cel-miR-784-3p(s)	2.89634	0.0818842	0.282604	-3.61027	1.74119	1.30657	1.33264	0.182649	0.644181
>cel-miR-35-5p(s)	1.38758	0.0764197	0.0800017	-3.70991	-0.0941097	1.70364	-0.0552404	0.955947	0.998569
cel-miR-242-3p(s)	0.411238	0.0669956	0	-3.89979	-2.1973	3.78695	-0.580231	0.561759	0.961679
>cel-miR-239b-3p(s)	0.438401	0.0660063	0	-3.92125	-2.2856	3.21955	-0.709915	0.477757	0.915365
cel-miR-355-3p(s)	0.465564	0.0650169	0	-3.94304	-2.35965	3.15826	-0.747137	0.454981	0.915365
>cel-miR-2219-5p(g)	1.15158	0.0605417	0.0841091	-4.04593	0.396664	1.72704	0.229678	0.818342	0.993815
>cel-miR-4927(g)	1.04505	0.0605417	0.066166	-4.04593	0.0769034	1.91421	0.040175	0.967954	0.999669
>cel-miR-786-5p(s)	2.51816	0.0595524	0.278483	-4.0697	1.98307	1.50305	1.31937	0.187047	0.652216
cel-miR-785-5p(s)	0.883004	0.0595524	0.0400023	-4.0697	-0.589507	2.19294	-0.268821	0.788068	0.993815
>cel-miR-2210-5p(s)	1.1288	0.0595524	0.0841063	-4.0697	0.258042	1.97722	0.130507	0.896165	0.994555
>cel-miR-2214-3p(s)	1.97686	0.0560665	0.194379	-4.15672	1.49708	1.5607	0.959235	0.33744	0.850116
>cel-miR-4811-5p(s)	0.564723	0.0550771	0	-4.1824	-2.59338	2.97702	-0.871132	0.383682	0.899533
>cel-miR-2207-5p(g)	0.867586	0.0446638	0.0661688	-4.48475	0.976577	2.6617	0.366899	0.713694	0.993815
>cel-miR-2212-3p(s)	0.274159	0.0446638	0	-4.48475	-1.63984	4.05639	-0.40426	0.686022	0.993815
>cel-miR-253-5p(s)	0.301321	0.0436744	0	-4.51707	-1.73918	3.71832	-0.467734	0.639975	0.98519
>cel-miR-1022-3p(s)	0.614261	0.0436744	0.035892	-4.51707	0.041928	2.66975	0.0157048	0.98747	0.999669
>cel-miR-1828(g)	0.82529	0.0382098	0.0579454	-4.70991	0.430682	2.22217	0.193811	0.846324	0.993815
>cel-lin-4-3p(s)	0.952569	0.0337346	0.0620585	-4.88963	0.516005	2.3302	0.221442	0.824748	0.993815
>cel-miR-2218a-5p(g)	0.689167	0.0223319	0.0620585	-5.48475	1.60115	2.56859	0.623356	0.533051	0.948356
>cel-miR-1819-5p(s)	0.532698	0.0223319	0.0441125	-5.48475	1.10386	3.11266	0.354635	0.722863	0.993815
>cel-miR-5551-3p(s)	0.137079	0.0223319	0	-5.48475	-0.954547	4.08047	-0.233931	0.815039	0.993815
cel-miR-796-3p(s)	0.137079	0.0223319	0	-5.48475	-0.954547	4.08047	-0.233931	0.815039	0.993815
>cel-miR-1019-5p(g)	1.16854	0.0213425	0.124111	-5.55012	2.49401	1.97725	1.26135	0.207182	0.700573
>cel-miR-5545-3p(g)	0.477181	0.0213425	0.035892	-5.55012	0.837181	3.21384	0.260492	0.794484	0.993815
>cel-miR-4932(g)	0.164242	0.0213425	0	-5.55012	-0.954547	4.08047	-0.233931	0.815039	0.993815
>cel-miR-76-5p(s)	0.164242	0.0213425	0	-5.55012	-0.954547	4.08047	-0.233931	0.815039	0.993815
>cel-miR-2208a-3p(g)	0.164242	0.0213425	0	-5.55012	-0.954547	4.08047	-0.233931	0.815039	0.993815
>cel-miR-256(g)	0.320712	0.0213425	0.017946	-5.55012	0.00723574	3.68098	0.00196571	0.998432	0.999669
>cel-miR-5595-5p(g)	1.18733	0.0168673	0.132326	-5.88963	2.47432	2.17208	1.13915	0.254641	0.76626
cel-lsy-6-5p(s)	0.652447	0.0168673	0.0620529	-5.88963	1.38298	2.59183	0.533595	0.593622	0.969336
>cel-miR-1818-5p(g)	0.200241	0.0168673	0	-5.88963	-0.954547	4.08047	-0.233931	0.815039	0.993815
>cel-miR-5546-5p(s)	0.200241	0.0168673	0	-5.88963	-0.954547	4.08047	-0.233931	0.815039	0.993815
>cel-miR-1833(g)	0.200241	0.0168673	0	-5.88963	-0.954547	4.08047	-0.233931	0.815039	0.993815
>cel-miR-792-5p(s)	0.200241	0.0168673	0	-5.88963	-0.954547	4.08047	-0.233931	0.815039	0.993815
>cel-miR-5553-5p(s)	0.35671	0.0168673	0.017946	-5.88963	0.00723647	3.54664	0.00204037	0.998372	0.999669
>cel-miR-249-5p(s)	0.35671	0.0168673	0.017946	-5.88963	0.00723647	3.54664	0.00204037	0.998372	0.999669
